# Supplementary material
Source: publisher figshare collection journal article supplement (https://frontiersin.figshare.com/ndownloader/files/10528750)
Supplement: Supplementary file 2 [file 10528750]

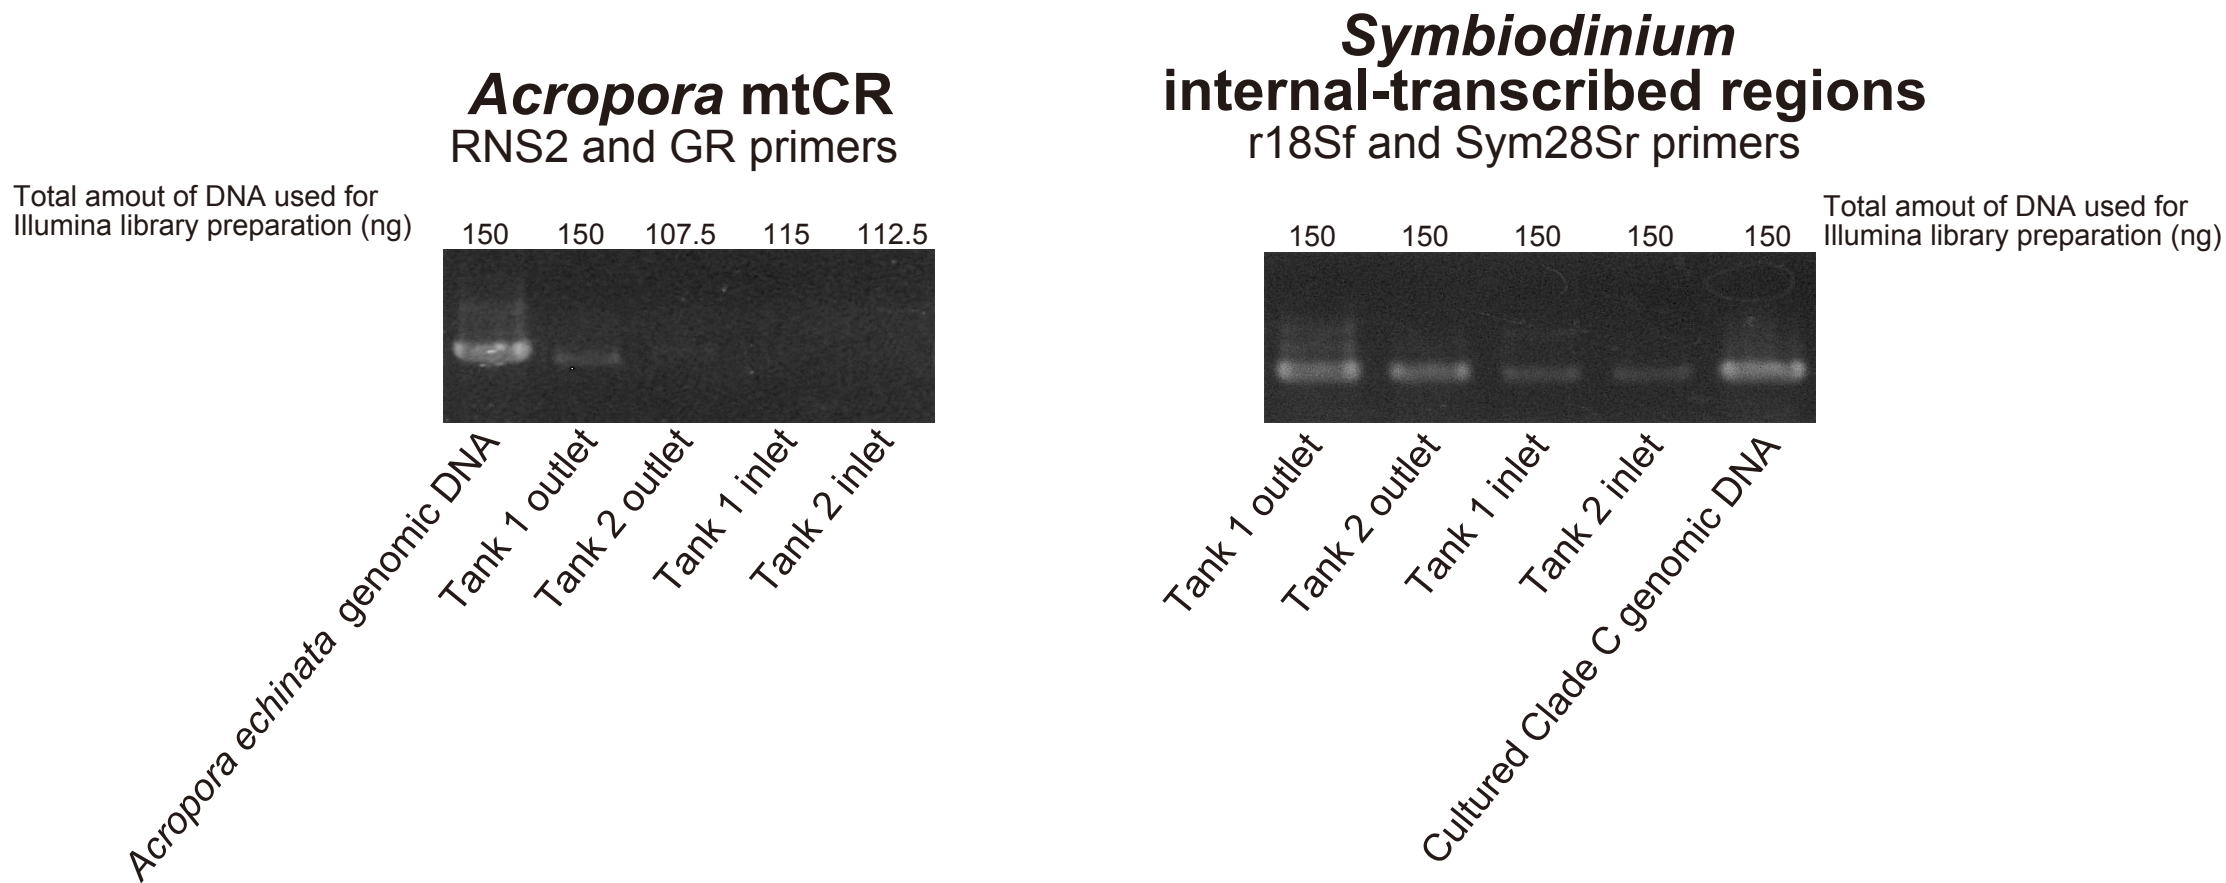

**Supplementary Fig. 1**

Frequencies of identical nucleotides in 60 bp sliding windows

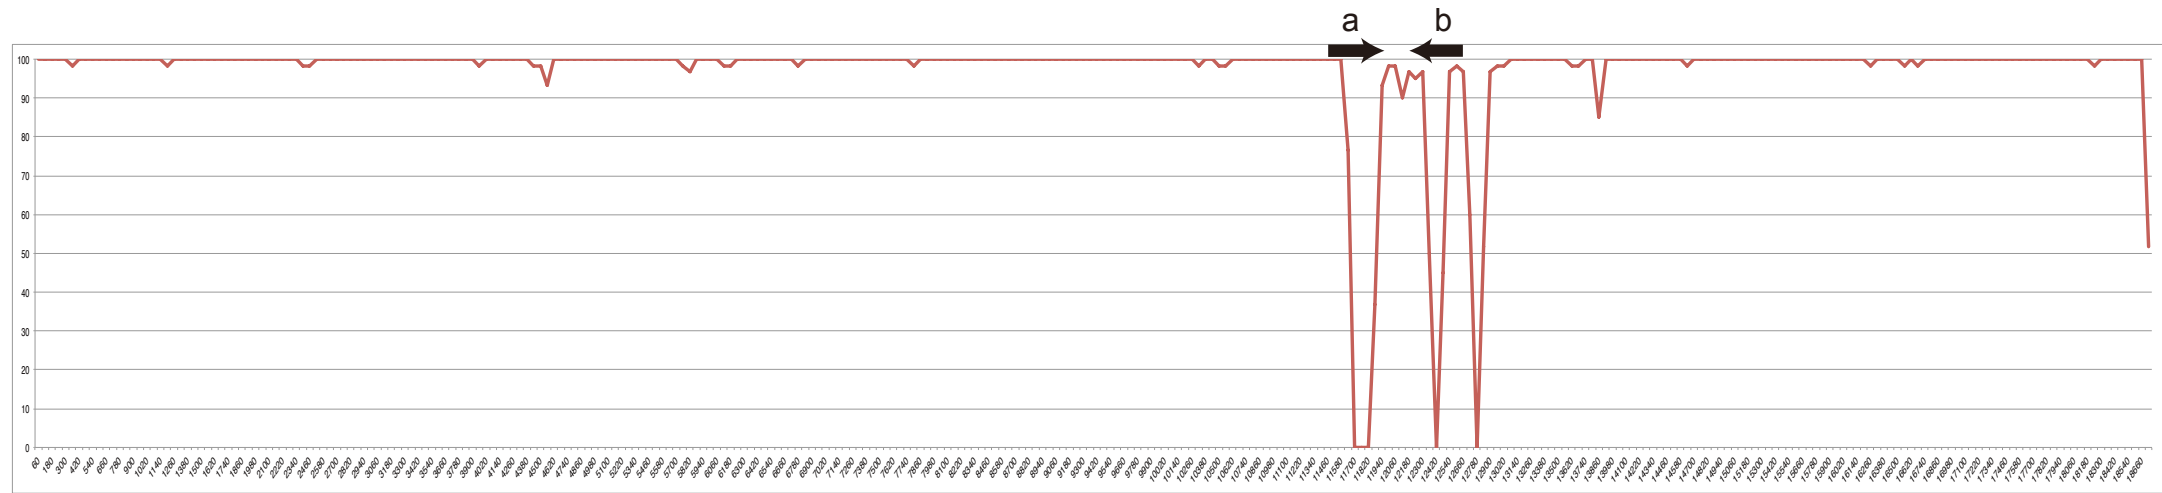

a: RNS2 flanking region (300 bp)

b: GR flanking region (300 bp)

**Supplementary Fig. 2**

Table S 1. Shotgun sequencing data (HiSeq2500, 250 bp paied-end) of coral species used in this study

| Colony IDs | Number of sequencing pairs | Total amount of basepair obtained | Length of mitochondrial genome assembled (bp) | Mapping rate of sequence data to the assembled mitochondrial genome (%) | Accession numbers of assembled mitochondria genome |
|------------|----------------------------|-----------------------------------|-----------------------------------------------|-------------------------------------------------------------------------|----------------------------------------------------|
| car1       | 3367407                    | 1796442737                        | 18373                                         | 0.17                                                                    | LC201813                                           |
| car2       | 3149196                    | 1685318759                        | 18372                                         | 0.35                                                                    | LC201814                                           |
| acu        | 3878093                    | 2112014606                        | 18586                                         | 0.55                                                                    | LC201815                                           |
| aus        | 2876443                    | 1546418599                        | 18346                                         | 0.74                                                                    | LC201816                                           |
| cyt1       | 2959536                    | 1607753259                        | 18568                                         | 0.22                                                                    | LC201817                                           |
| cyt2       | 3681403                    | 1999195740                        | 18567                                         | 0.46                                                                    | LC201818                                           |
| cyt3       | 4273430                    | 2330048749                        | 18568                                         | 0.71                                                                    | LC201819                                           |
| ech1       | 3806346                    | 2067711944                        | 18480                                         | 0.16                                                                    | LC201820                                           |
| ech2       | 4343385                    | 2317850689                        | 18480                                         | 0.13                                                                    | LC201821                                           |
| ech3       | 3620618                    | 1916997459                        | 18480                                         | 0.21                                                                    | LC201822                                           |
| ech4       | 3801720                    | 2002076650                        | 18480                                         | 0.39                                                                    | LC201823                                           |
| ech5       | 4098787                    | 2187935333                        | 18480                                         | 0.21                                                                    | LC201824                                           |
| ech6       | 3616695                    | 1962631349                        | 18480                                         | 0.63                                                                    | LC201825                                           |
| ech7       | 3270030                    | 1796697214                        | 18482                                         | 0.26                                                                    | LC201826                                           |
| flo        | 3470418                    | 1819438400                        | 18365                                         | 0.47                                                                    | LC201827                                           |
| gra        | 3698134                    | 1972553862                        | 18479                                         | 0.62                                                                    | LC201828                                           |
| hya1       | 3620603                    | 1906943573                        | 18567                                         | 0.63                                                                    | LC201829                                           |
| hya2       | 3665653                    | 1976242358                        | 18567                                         | 0.35                                                                    | LC201830                                           |
| hya3       | 3592503                    | 1972822254                        | 18567                                         | 0.35                                                                    | LC201831                                           |
| hya4       | 3257839                    | 1774658951                        | 18568                                         | 0.33                                                                    | LC201832                                           |
| int        | 4152622                    | 2272624556                        | 18479                                         | 0.44                                                                    | LC201833                                           |
| sp         | 3525840                    | 1944726206                        | 18481                                         | 0.53                                                                    | LC201834                                           |
| sp1        | 4072885                    | 2255450380                        | 18368                                         | 0.22                                                                    | LC201835                                           |
| sp2        | 3513970                    | 1941895056                        | 18482                                         | 0.35                                                                    | LC201836                                           |
| sp3        | 3772572                    | 2056091223                        | 18368                                         | 0.41                                                                    | LC201837                                           |
| sp4        | 3176578                    | 1753588443                        | 18480                                         | 0.27                                                                    | LC201838                                           |
| sp5        | 2246499                    | 1234378818                        | 18482                                         | 0.17                                                                    | LC201839                                           |
| sp6        | 2377151                    | 1307400928                        | 18480                                         | 0.2                                                                     | LC201840                                           |
| sp7        | 1893803                    | 1042472832                        | 18367                                         | 0.29                                                                    | LC201841                                           |
| mic        | 1961295                    | 1057435930                        | 18479                                         | 0.52                                                                    | LC201842                                           |
| micD       | 2461567                    | 1349712700                        | 18481                                         | 0.25                                                                    | LC201843                                           |
| mur        | 2366241                    | 1289180256                        | 18480                                         | 0.57                                                                    | LC201844                                           |
| nas1       | 2875349                    | 1576430860                        | 18374                                         | 0.49                                                                    | LC201845                                           |
| nas2       | 3558273                    | 1861092779                        | 18484                                         | 0.4                                                                     | LC201846                                           |
| sel1       | 3575287                    | 1929303103                        | 18482                                         | 0.3                                                                     | LC201847                                           |
| sel2       | 3456066                    | 1837574598                        | 18480                                         | 0.47                                                                    | LC201848                                           |
| awi1       | 3683732                    | 1997169293                        | 18479                                         | 0.8                                                                     | LC201849                                           |
| awi2       | 3937101                    | 2172887859                        | 18479                                         | 0.7                                                                     | LC201850                                           |
| awi3       | 3883260                    | 2127325278                        | 18479                                         | 0.47                                                                    | LC201851                                           |
| awi4       | 3654174                    | 2025305178                        | 18479                                         | 0.46                                                                    | LC201852                                           |
| awi5       | 3851645                    | 2130342123                        | 18479                                         | 0.7                                                                     | LC201853                                           |
| awi6       | 4052097                    | 2228809055                        | 18479                                         | 0.66                                                                    | LC201854                                           |
| awi7       | 4399971                    | 2406175346                        | 18479                                         | 0.34                                                                    | LC201855                                           |
| ten1       | 3816691                    | 2120452861                        | 18342                                         | 0.68                                                                    | LC201856                                           |
| ten10      | 2375983                    | 1292393914                        | 18342                                         | 0.57                                                                    | LC201857                                           |
| ten11      | 3721532                    | 2048716582                        | 18343                                         | 1.01                                                                    | LC201858                                           |
| ten12      | 3758520                    | 2041398504                        | 18342                                         | 0.57                                                                    | LC201859                                           |
| ten13      | 4003353                    | 2101282078                        | 18342                                         | 0.66                                                                    | LC201860                                           |
| ten14      | 4269708                    | 2329115318                        | 18342                                         | 0.78                                                                    | LC201861                                           |
| ten15      | 4419011                    | 2361477787                        | 18343                                         | 0.78                                                                    | LC201862                                           |
| ten2       | 4022864                    | 2200368866                        | 18342                                         | 0.49                                                                    | LC201863                                           |
| ten3       | 2371259                    | 1285509935                        | 18342                                         | 0.57                                                                    | LC201864                                           |
| ten4       | 2722342                    | 1499595814                        | 18342                                         | 0.78                                                                    | LC201865                                           |
| ten5       | 3753338                    | 2060306029                        | 18342                                         | 0.83                                                                    | LC201866                                           |
| ten6       | 2516053                    | 1355975681                        | 18342                                         | 0.89                                                                    | LC201867                                           |
| ten7       | 2577141                    | 1369986222                        | 18342                                         | 0.54                                                                    | LC201868                                           |
| ten8       | 2889143                    | 1521250287                        | 18341                                         | 0.81                                                                    | LC201869                                           |
| ten9       | 2444329                    | 1339643217                        | 18342                                         | 0.67                                                                    | LC201870                                           |

Abbreviations are the same as in Table 1.

Table S 2. Percent identity of mtCR sequences to the most similar sequence within the corals used in this study

| mtCR types in the database                  | Percent identity | Most similar mtCR in the database           |
|---------------------------------------------|------------------|---------------------------------------------|
| car1                                        | 99.76            | car2                                        |
| car2                                        | 99.76            | car1                                        |
| acu                                         | 89.16            | micD                                        |
| aus                                         | 97.44            | ten12_ten13_ten1_ten2_ten3_ten7             |
| cyt1                                        | 99.89            | cyt2_cyt3_hya1_hya2_hya3_hya4               |
| cyt2_cyt3_hya1_hya2_hya3_hya4               | 99.89            | cyt1                                        |
| ech1_ech2_ech5_ech6_mur_sel2                | 99.89            | ech3_ech4                                   |
| ech3_ech4                                   | 100.00           | adi                                         |
| ech7                                        | 99.89            | ech3_ech4                                   |
| flo                                         | 98.17            | sp2_sp4                                     |
| gra_int_awi1_awi2_awi3_awi4_awi5_awi6_awi7  | 99.68            | cyt1                                        |
| sp1_sp6                                     | 99.89            | ech3_ech4                                   |
| sp2_sp4                                     | 99.63            | sp                                          |
| sp3                                         | 99.89            | sp1_sp6                                     |
| sp5                                         | 99.89            | ech7                                        |
| sp7                                         | 99.89            | sp5                                         |
| sp                                          | 99.63            | sp2_sp4                                     |
| micD                                        | 98.61            | cyt1                                        |
| mic                                         | 99.25            | ech3_ech4                                   |
| nas1                                        | 88.45            | nas2                                        |
| nas2                                        | 99.89            | ech3_ech4                                   |
| sel1                                        | 99.89            | ech3_ech4                                   |
| ten10_ten11_ten14_ten15_ten4_ten5_ten8_ten9 | 99.88            | ten6                                        |
| ten12_ten13_ten1_ten2_ten3_ten7             | 99.88            | ten6                                        |
| ten6                                        | 99.88            | ten10_ten11_ten14_ten15_ten4_ten5_ten8_ten9 |
| adi                                         | 100.00           | ech3_ech4                                   |

Abbreviations are the same as in Table 1 and IDs those mitochondrial DNA are identical are concatenated.

Table S3. Percent identities of 300 bp flanking the RNS2 primer compared to the most similar mtCR sequence in the corals used in this study

| RNS2 types in the database used            | Percent identity | Most similar RNS2 types |
|--------------------------------------------|------------------|-------------------------|
| aus                                        | 97.00            | ten                     |
| cyt_hya                                    | 99.00            | flo_gra_int_awi         |
| flo_gra_int_awi                            | 99.00            | cyt_hya                 |
| ten                                        | 97.00            | aus                     |
| acu                                        | 85.03            | micD                    |
| ech_adi_mur_sel_sp                         | 99.67            | sp1_sp2-4_sp6           |
| sp1_sp2-4_sp6                              | 99.67            | ech_adi_mur_sel_sp      |
| sp5_sp7                                    | 99.67            | ech_adi_mur_sel_sp      |
| car1                                       | 99.67            | car2                    |
| car2                                       | 99.67            | car1                    |
| nas2                                       | 99.67            | ech_adi_mur_sel_sp      |
| micD                                       | 98.33            | cyt1                    |
| mic                                        | 99.33            | ech_adi_mur_sel_sp      |
| nas1                                       | 47.42            | nas2                    |
| Abbreviations are the same as in Figure 3. |                  |                         |

Table S 4. Percent identities of 300 bp flanking the GR primer to the most similar mtCR sequence in the corals used in this study

| GR types                                    | Percent identity | Most similar GR type            |
|---------------------------------------------|------------------|---------------------------------|
| ten6                                        | 99.67            | ten12_ten13_ten1_ten2_ten3_ten7 |
| cyt2_cyt3_hya1_hya2_hya3_hya4               | 99.67            | nas_mic_ech_adi_sel_sp          |
| nas_mic_ech_adi_sel_sp                      | 99.67            | cyt2_cyt3_hya1_hya2_hya3_hya4   |
| sp2_sp4                                     | 99.67            | flo                             |
| car2                                        | 99.67            | car1                            |
| ech7                                        | 99.67            | nas_mic_ech_adi_sel_sp          |
| micD                                        | 99.00            | cyt2_cyt3_hya1_hya2_hya3_hya4   |
| ten12_ten13_ten1_ten2_ten3_ten7             | 99.67            | ten6                            |
| sp7                                         | 99.67            | ech7                            |
| aus                                         | 98.33            | ten12_ten13_ten1_ten2_ten3_ten7 |
| ten10_ten11_ten14_ten15_ten4_ten5_ten8_ten9 | 99.67            | ten6                            |
| flo                                         | 99.67            | sp2_sp4                         |
| car1                                        | 99.67            | car2                            |

Abbreviations are the same as in Table 1.

Table S 5. Weight in water and number of valid alignments of *Acropora* species used in this study

|       | <i>Acropora</i> species                                            | Number of colonies | Weight in water (kg) | Number of valid alignment | Number of valid alignment per kg | Average number of read per kg |
|-------|--------------------------------------------------------------------|--------------------|----------------------|---------------------------|----------------------------------|-------------------------------|
| Tank1 | <i>tenuis</i>                                                      | 20                 | 11.2                 | 59487                     | 5311.34                          | 3389.98                       |
|       | <i>echinata, digitifera, selago, nasta, muricata, Acropora</i> sp. | 9                  | 1.94                 | 3873                      | 1996.39                          |                               |
|       | <i>hyacinthus, cytherea</i>                                        | 7                  | 0.54                 | 2038                      | 3774.07                          |                               |
|       | <i>acuminata</i>                                                   | 1                  | 0.07                 | 23                        | 328.57                           |                               |
|       | <i>austera</i>                                                     | 1                  | 0.11                 | 271                       | 2463.64                          |                               |
|       | <i>grandis, intermedia, florida</i>                                | 3                  | 0.38                 | 1165                      | 3065.79                          |                               |
|       | <i>microphthalma</i>                                               | 1                  | 0.1                  | 938                       | 9380.00                          |                               |
|       | <i>carduus</i>                                                     | 2                  | 0.17                 | 136                       | 800.00                           |                               |
| Tank2 | <i>echinata</i>                                                    | 7                  | 1.1                  | 15909                     | 14462.73                         | 13492.34                      |
|       | <i>awi</i>                                                         | 7                  | 1.3                  | 3419                      | 2630.00                          |                               |
|       | <i>Acropora</i> sp.                                                | 7                  | 1.4                  | 32738                     | 23384.29                         |                               |

*Acropora* sp. is unidentified species similar to *A. echinata*
